# Supplementary material for: BayesRVAT enhances rare-variant association testing through Bayesian aggregation of functional annotations
Source: Genome Res. 2025 Dec;35(12):2682–90. doi: 10.1101/gr.280689.125 (PMC12667389; doi:10.1101/gr.280689.125)
Supplement: Supplement 2 [file Supplemental_Table_S1.xlsx]

## Sheet: Sheet1
Gene	Trait	P pLoF	P ACAT-Conseq	P ACAT-MultiAnnot	P BayesRVAT	β pLoF	β BayesRVAT
MIP	Cataract	4.33E-13	1.30E-12	8.84E-28	7.54E-28	2.47	3.01
GCK	T2D	2.81E-16	8.88E-16	3.97E-22	3.60E-25	3.55	3.51
LDLR	CAD	1.12E-15	3.44E-15	2.84E-14	1.06E-21	2.18	2.05
HNF1A	T2D	1.62E-07	4.87E-07	1.92E-08	2.93E-14	1.73	3.32
GUCY1A1	HT	2.47E-07	7.41E-07	3.62E-08	2.72E-12	0.92	1.01
GIGYF1	T2D	4.82E-12	1.44E-11	1.20E-10	6.98E-12	1.71	1.90
PRPH2	AMD	6.33E-07	1.90E-06	1.45E-06	8.52E-12	1.43	2.65
FES	HT	1.18E-03	1.41E-04	5.53E-08	2.37E-09	0.70	0.66
PKD1	HT	2.25E-06	6.75E-06	5.63E-05	1.33E-07	1.15	2.44
